# Supplementary material for: Geochemistry and Mineralogy of Ferromanganese Crusts from the Western Cocos-Nazca Spreading Centre, Pacific
Source: MDPI journal article supplement (doi:10.3390/min12050538), 2022-04-26
Supplement: s1 [file s1]

**Table S1.** Representative EPMA data of major Mn-Fe oxyhydroxides. All chemical data in wt.%.

| Sample ID | SIO000D1   | SIO000OD1  | SIO000OD1  | SIO0000D1      | SIO0000D1      | SIO000OD1  | SIO000OD1  | SIO000OD2 | SIO000OD2 | SIO000OD2 | SIO000OD2 | SIO0000D2        | SIO0000D2        | SIO00003U           | SIO00003U           | SIO00003U           | SIO00003U           | SIO00003U           | SIO00003U           | SIO0000BP | SIO0000BP | SIO0000BP | SIO0000BP  | SIO0000BP | SIO0000BP |
|-----------|------------|------------|------------|----------------|----------------|------------|------------|-----------|-----------|-----------|-----------|------------------|------------------|---------------------|---------------------|---------------------|---------------------|---------------------|---------------------|-----------|-----------|-----------|------------|-----------|-----------|
| No.       | 93         | 114        | 67         | 64             | 65             | 99         | 101        | 155       | 156       | 123       | 124       | 130              | 131              | 23                  | 174                 | 175                 | 16                  | 17                  | 18                  | 80        | 81        | 49        | 196        | 197       | 198       |
| Mineral   | birnessite | birnessite | birnessite | birnessite     | birnessite     | birnessite | birnessite | vernadite | vernadite | vernadite | vernadite | vernadite        | vernadite        | todorokite/buserite | todorokite/buserite | todorokite/buserite | todorokite/buserite | todorokite/buserite | todorokite/buserite | asbolane  | asbolane  | asbolane  | maanginite | manginite | manginite |
| Si        | 0.061      | 0.054      | 0.008      | -              | -              | 0.046      | 0.052      | 5.586     | 5.703     | 4.609     | 5.548     | 2.306            | 1.973            | 0.013               | 0.012               | 0.088               | 0.043               | 0.030               | 0.011               | 2.028     | 1.433     | 0.272     | 0.098      | 0.062     | 0.055     |
| Al        | 0.133      | 0.420      | 0.052      | 0.063          | 0.057          | 0.003      | 0.008      | 0.596     | 0.799     | 0.252     | 0.459     | 0.485            | 0.573            | 0.103               | 0.098               | 0.045               | 0.059               | 0.053               | 0.038               | 0.151     | 0.204     | 0.116     | 0.034      | 0.015     | 0.015     |
| Cl        | 0.328      | 0.100      | 0.153      | 0.090          | 0.130          | 0.970      | 2.340      | 0.273     | 0.522     | 0.418     | 0.433     | 0.215            | 0.270            | 0.666               | 0.358               | 1.796               | 0.210               | 0.187               | 0.165               | 0.413     | 0.191     | 0.103     | 0.132      | 0.339     | 0.137     |
| Ba        | 0.106      | 0.084      | 0.133      | 0.152          | 0.159          | 0.077      | 0.031      | 0.144     | 0.149     | 0.054     | 0.131     | 0.136            | 0.086            | 0.054               | 0.065               | 0.034               | 0.038               | 0.029               | 0.047               | 0.103     | 0.081     | 0.044     | 0.347      | 0.380     | 0.274     |
| Ca        | 1.858      | 1.553      | 1.283      | 1.164          | 1.015          | 1.418      | 1.684      | 1.463     | 1.614     | 2.030     | 1.540     | 1.297            | 1.753            | 1.032               | 1.210               | 1.650               | 1.113               | 1.291               | 1.255               | 1.374     | 1.692     | 1.783     | 1.265      | 1.433     | 1.098     |
| Fe        | 0.756      | 0.253      | 0.220      | 0.162          | 0.109          | 0.047      | 0.040      | 31.455    | 26.092    | 25.247    | 28.651    | 11.464           | 13.475           | 0.040               | 0.055               | 0.109               | 0.073               | 0.135               | 0.110               | 11.648    | 7.138     | 3.064     | 0.092      | 0.054     | 0.361     |
| Mn        | 52.413     | 49.411     | 52.244     | 51.079         | 49.493         | 52.208     | 50.322     | 12.311    | 16.955    | 19.454    | 14.726    | 36.921           | 35.651           | 48.969              | 49.981              | 52.391              | 50.390              | 50.932              | 51.973              | 37.548    | 39.469    | 46.289    | 52.216     | 51.549    | 50.508    |
| Ti        | 0.026      | 0.003      | 0.014      | 0.021          | 0.021          | 0.023      | -          | 0.385     | 0.326     | 0.250     | 0.492     | 0.146            | 0.169            | 0.014               | -                   | -                   | 0.004               | 0.003               | 0.004               | 0.156     | 0.122     | 0.081     | 0.089      | 0.007     | 0.075     |
| P         | 0.063      | 0.068      | 0.020      | 0.013          | 0.017          | 0.008      | 0.020      | 0.459     | 0.422     | 0.399     | 0.456     | 0.269            | 0.341            | 0.032               | 0.007               | 0.037               | 0.031               | 0.020               | 0.000               | 0.303     | 0.225     | 0.123     | 0.012      | 0.021     | 0.021     |
| Pb        | 0.018      | 0.032      | 0.009      | 0.045          | -              | -          | -          | 0.058     | -         | -         | 0.067     | -                | -                | -                   | -                   | -                   | -                   | -                   | -                   | 0.027     | -         | -         | 0.004      | -         | -         |
| Cu        | 0.127      | 0.276      | 0.020      | 0.117          | 0.069          | 0.010      | 0.045      | 0.055     | 0.110     | 0.040     | 0.058     | 0.807            | 0.480            | 0.049               | -                   | 0.039               | 0.039               | 0.029               | 0.000               | 0.809     | 0.705     | 0.984     | 0.023      | -         | -         |
| Co        | 0.208      | 0.004      | 0.027      | 0.014          | -              | 0.428      | 0.126      | 0.129     | 0.088     | 0.047     | 0.115     | 0.020            | 0.046            | 0.017               | 0.012               | 0.016               | 0.020               | 0.020               | 0.019               | 0.054     | 0.036     | 0.020     | -          | -         | -         |
| K         | 0.970      | 0.964      | 1.348      | 1.623          | 1.512          | 1.560      | 1.264      | 0.169     | 0.141     | 0.164     | 0.241     | 0.277            | 0.293            | 1.406               | 1.530               | 1.282               | 0.926               | 0.755               | 0.769               | 0.650     | 0.762     | 1.202     | 1.064      | 1.062     | 1.030     |
| Sr        | -          | -          | 0.008      | -              | -              | -          | -          | 0.085     | 0.104     | 0.023     | 0.047     | 0.034            | -                | 0.025               | -                   | -                   | -                   | -                   | -                   | 0.065     | 0.069     | 0.010     | -          | -         | -         |
| Zn        | 0.134      | 0.390      | 0.108      | 0.071          | 0.048          | 0.011      | 0.051      | 0.067     | 0.084     | 0.050     | 0.093     | 0.190            | 0.199            | 0.037               | 0.092               | 0.075               | 0.129               | 0.000               | 0.075               | 0.358     | 0.391     | 0.470     | 0.000      | 0.018     | 0.067     |
| Tl        | 0.019      | -          | 0.001      | 0.021          | -              | -          | -          | 0.013     | -         | 0.007     | 0.042     | 0.041            | -                | -                   | -                   | 0.036               | -                   | 0.008               | -                   | -         | 0.009     | 0.041     | 0.047      | 0.051     | 0.032     |
| Ni        | 0.436      | 0.827      | 0.066      | 0.094          | 0.088          | -          | -          | 0.085     | 0.230     | 0.187     | 0.083     | 3.024            | 2.021            | 0.042               | 0.044               | 0.086               | 0.079               | 0.061               | 0.023               | 2.294     | 2.507     | 3.176     | -          | 0.032     | 0.016     |
| S         | 0.090      | 0.037      | 0.042      | 0.048          | 0.040          | 0.095      | 0.102      | 0.086     | 0.147     | 0.227     | 0.110     | 0.082            | 0.232            | 0.072               | 0.083               | 0.114               | 0.094               | 0.104               | 0.066               | 0.162     | 0.220     | 0.102     | 0.082      | 0.097     | 0.075     |
| Na        | 1.096      | 2.041      | 2.394      | 1.518          | 1.196          | 1.334      | 0.766      | 0.449     | 0.302     | 0.229     | 0.344     | 0.988            | 0.858            | 1.900               | 2.110               | 2.351               | 3.030               | 4.039               | 3.320               | 1.260     | 1.296     | 2.588     | 1.442      | 1.679     | 1.591     |
| Mg        | 2.161      | 2.262      | 2.190      | 2.928          | 2.666          | 2.949      | 2.508      | 0.736     | 0.879     | 0.397     | 0.566     | 2.956            | 1.630            | 3.148               | 2.958               | 2.647               | 1.977               | 1.787               | 1.484               | 1.638     | 1.915     | 1.280     | 2.048      | 2.069     | 1.990     |
| As        | 0.050      | 0.090      | 0.055      | 0.108          | 0.125          | 0.106      | 0.074      | 0.037     | 0.010     | -         | -         | 0.124            | -                | 0.048               | 0.127               | 0.076               | 0.031               | 0.026               | 0.035               | 0.063     | 0.059     | 0.084     | 0.052      | 0.096     | 0.040     |
| Total     | 79.88      | 77.37      | 78.97      | 77.81          | 74.34          | 79.96      | 76.73      | 76.43     | 76.62     | 74.54     | 75.65     | 83.41            | 80.63            | 75.54               | 77.04               | 81.66               | 76.27               | 77.86               | 77.50               | 81.57     | 77.97     | 80.90     | 77.22      | 76.99     | 75.04     |
| Rest      | 20.12      | 22.63      | 21.03      | 22.19          | 25.66          | 20.04      | 23.27      | 23.57     | 23.38     | 25.47     | 24.35     | 16.59            | 19.38            | 24.46               | 22.97               | 18.34               | 23.73               | 22.14               | 22.50               | 18.43     | 22.03     | 19.10     | 22.78      | 23.01     | 24.96     |
| Mn/Fe     | 69         | 196        | 238        | 316            | 455            | 1120       | 1270       | -         | 1         | 1         | 1         | 3                | 3                | 1212                | 906                 | 482                 | 690                 | 377                 | 474                 | 3         | 6         | 15        | 565        | 962       | 140       |
| Comments  | -          | -          | -          | diatom phantom | diatom phantom | -          | -          | Fe-Mn     | Fe-Mn     | Fe-Mn     | Fe-Mn     | Mn-Fe metal rich | Mn-Fe metal rich | -                   | -                   | -                   | -                   | -                   | -                   | Ni-(Cu)   | Ni-(Cu)   | Ni-(Cu)   | -          | -         | -         |

Table S2. Complete EPMA data of major and accessory minerals identified in crusts from C-NSC. All chemical data in wt.%.

| Minerals | Mn-Fe oxyhydroxides |       |       |           |             |           |      |       |           |             |                     |       |       |           |             |          |      |       |           |             |                                 |       |       |           |             |
|----------|---------------------|-------|-------|-----------|-------------|-----------|------|-------|-----------|-------------|---------------------|-------|-------|-----------|-------------|----------|------|-------|-----------|-------------|---------------------------------|-------|-------|-----------|-------------|
|          | Birnessite          |       |       |           |             | Vernadite |      |       |           |             | Todorokite/Buserite |       |       |           |             | Asbolane |      |       |           |             | non-identified Mn-oxyhydroxides |       |       |           |             |
|          | N                   | 31    |       |           |             | 58        |      |       |           | 71          |                     |       |       | 13        |             |          |      | 3     |           |             |                                 |       |       |           |             |
|          | Min                 | Max   | Mean  | Std. dev. | Coeff. var. | Min       | Max  | Mea n | Std. dev. | Coeff. var. | Min                 | Max   | Mean  | Std. dev. | Coeff. var. | Min      | Max  | Mea n | Std. dev. | Coeff. var. | Min                             | Max   | Mean  | Std. dev. | Coeff. var. |
| Si       | –                   | 2.38  | 0.29  | 0.59      | 2.07        | 1.97      | 9.90 | 5.45  | 1.83      | 0.34        | –                   | 0.19  | 0.04  | 0.03      | 1.20        | 0.08     | 3.23 | 1.00  | 0.85      | 0.84        | 0.05                            | 0.10  | 0.07  | 0.02      | 0.27        |
| Al       | –                   | 1.80  | 0.30  | 0.39      | 1.30        | 0.10      | 1.16 | 0.52  | 0.25      | 0.48        | –                   | 0.16  | 0.04  | 0.03      | 1.05        | 0.12     | 1.33 | 0.48  | 0.38      | 0.78        | 0.02                            | 0.03  | 0.02  | 0.01      | 0.41        |
| Cl       | 0.04                |       |       |           |             |           | 2.30 |       |           |             | 0.07                |       |       |           |             | 0.07     | 0.53 |       |           |             |                                 |       |       |           |             |
|          | 8                   | 2.340 | 0.316 | 0.468     | 1.479       | 0.139     | 6    | 0.843 | 0.508     | 0.603       | 3                   | 1.796 | 0.344 | 0.412     | 0.834       | 8        | 3    | 0.248 | 0.159     | 0.642       | 0.132                           | 0.339 | 0.203 | 0.096     | 0.476       |
|          | 0.00                |       |       |           |             |           | 0.27 |       |           |             | 0.00                |       |       |           |             | 0.04     | 0.13 |       |           |             |                                 |       |       |           |             |
| Ba       | 2                   | 0.168 | 0.087 | 0.045     | 0.510       | 0.016     | 6    | 0.116 | 0.049     | 0.418       | 0                   | 0.487 | 0.122 | 0.144     | 0.845       | 1        | 0    | 0.090 | 0.029     | 0.317       | 0.274                           | 0.380 | 0.334 | 0.044     | 0.132       |
|          | 1.01                |       |       |           |             |           | 2.64 |       |           |             | 0.94                |       |       |           |             | 1.16     | 2.06 |       |           |             |                                 |       |       |           |             |
| Ca       | 5                   | 1.888 | 1.424 | 0.235     | 0.165       | 1.156     | 3    | 1.803 | 0.370     | 0.205       | 5                   | 1.710 | 1.275 | 0.166     | 7.687       | 2        | 6    | 1.591 | 0.263     | 0.165       | 1.098                           | 1.433 | 1.265 | 0.137     | 0.108       |
|          |                     |       |       |           |             |           | 35.1 |       |           |             |                     |       |       |           |             |          | 19.0 |       |           |             |                                 |       |       |           |             |
| Fe       | –                   | 13.53 | 2.09  | 4.03      | 1.92        | 7.13      | 1    | 25.65 | 5.50      | 0.21        | –                   | 0.72  | 0.15  | 0.15      | 1.03        | 1.18     | 1    | 7.08  | 4.65      | 0.66        | 0.05                            | 0.36  | 0.17  | 0.14      | 0.81        |
|          | 34.1                |       |       |           |             |           | 40.7 |       |           |             | 48.1                |       |       |           |             | 29.6     | 46.8 |       |           |             |                                 |       |       |           |             |
| Mn       | 8                   | 52.61 | 47.64 | 5.79      | 0.12        | 9.85      | 0    | 18.79 | 6.39      | 0.34        | 4                   | 53.80 | 51.17 | 1.13      | 45.45       | 2        | 6    | 40.81 | 4.37      | 0.11        | 50.51                           | 52.22 | 51.42 | 0.70      | 0.01        |
|          |                     |       |       |           |             |           | 0.75 |       |           |             |                     |       |       |           |             | 0.04     | 0.26 |       |           |             |                                 |       |       |           |             |
| Ti       | –                   | 0.203 | 0.039 | 0.056     | 1.447       | 0.135     | 7    | 0.357 | 0.131     | 0.367       | –                   | 0.152 | 0.024 | 0.039     | 0.608       | 7        | 6    | 0.113 | 0.055     | 0.488       | 0.007                           | 0.089 | 0.057 | 0.036     | 0.633       |
|          |                     |       |       |           |             |           | 0.76 |       |           |             |                     |       |       |           |             | 0.08     | 0.36 |       |           |             |                                 |       |       |           |             |
| P        | –                   | 0.313 | 0.064 | 0.077     | 1.196       | 0.206     | 7    | 0.465 | 0.119     | 0.256       | –                   | 0.113 | 0.020 | 0.018     | 1.120       | 1        | 4    | 0.200 | 0.085     | 0.427       | 0.012                           | 0.021 | 0.018 | 0.005     | 0.249       |
|          |                     |       |       |           |             |           | 0.10 |       |           |             |                     |       |       |           |             |          | 0.06 |       |           |             |                                 |       |       |           |             |
| Pb       | –                   | 0.049 | 0.010 | 0.016     | 1.701       | –         | 1    | 0.026 | 0.028     | 1.071       | –                   | 0.090 | 0.010 | 0.019     | 0.523       | –        | 7    | 0.014 | 0.020     | 1.421       | –                               | 0.004 | 0.001 | 0.002     | 1.414       |
|          |                     |       |       |           |             |           | 0.80 |       |           |             |                     |       |       |           |             | 0.33     | 1.22 |       |           |             |                                 |       |       |           |             |
| Cu       | –                   | 1.237 | 0.253 | 0.308     | 1.218       | –         | 7    | 0.127 | 0.161     | 1.270       | –                   | 0.680 | 0.039 | 0.085     | 0.460       | 2        | 4    | 0.775 | 0.272     | 0.352       | –                               | 0.023 | 0.008 | 0.011     | 1.414       |
|          |                     |       |       |           |             |           | 0.17 |       |           |             |                     |       |       |           |             |          | 0.09 |       |           |             |                                 |       |       |           |             |
| Co       | –                   | 0.428 | 0.051 | 0.084     | 1.646       | 0.002     | 0    | 0.092 | 0.035     | 0.374       | –                   | 0.066 | 0.008 | 0.012     | 0.696       | –        | 7    | 0.034 | 0.026     | 0.761       | –                               | –     | –     | –         | –           |
|          | 0.21                |       |       |           |             |           | 0.36 |       |           |             | 0.69                |       |       |           |             | 0.16     | 1.20 |       |           |             |                                 |       |       |           |             |
| K        | 8                   | 1.843 | 1.126 | 0.513     | 0.455       | 0.058     | 3    | 0.224 | 0.066     | 0.293       | 4                   | 1.822 | 1.249 | 0.305     | 4.098       | 1        | 2    | 0.524 | 0.329     | 0.628       | 1.030                           | 1.064 | 1.052 | 0.015     | 0.015       |
|          |                     |       |       |           |             |           | 0.10 |       |           |             |                     |       |       |           |             |          | 0.07 |       |           |             |                                 |       |       |           |             |
| Sr       | –                   | 0.042 | 0.004 | 0.009     | 2.399       | –         | 4    | 0.020 | 0.027     | 1.322       | –                   | 0.080 | 0.004 | 0.013     | 0.282       | –        | 0    | 0.021 | 0.027     | 1.301       | –                               | 0.030 | 0.010 | 0.014     | 1.414       |
|          |                     |       |       |           |             |           | 0.26 |       |           |             |                     |       |       |           |             | 0.08     | 0.47 |       |           |             |                                 |       |       |           |             |
| Zn       | –                   | 0.434 | 0.137 | 0.119     | 0.870       | –         | 7    | 0.082 | 0.053     | 0.647       | –                   | 0.520 | 0.091 | 0.109     | 0.842       | 8        | 0    | 0.291 | 0.110     | 0.378       | –                               | 0.067 | 0.028 | 0.029     | 1.007       |
|          |                     |       |       |           |             |           | 0.06 |       |           |             |                     |       |       |           |             |          | 0.04 |       |           |             |                                 |       |       |           |             |
| Tl       | –                   | 0.064 | 0.015 | 0.018     | 1.230       | –         | 7    | 0.011 | 0.016     | 1.454       | –                   | 0.082 | 0.022 | 0.026     | 0.829       | –        | 7    | 0.018 | 0.018     | 0.964       | 0.032                           | 0.051 | 0.044 | 0.008     | 0.187       |
|          |                     |       |       |           |             |           | 3.03 |       |           |             |                     |       |       |           |             | 1.21     | 3.82 |       |           |             |                                 |       |       |           |             |
| Ni       | –                   | 3.851 | 0.858 | 1.138     | 1.327       | 0.004     | 7    | 0.334 | 0.632     | 1.892       | –                   | 1.782 | 0.077 | 0.221     | 0.350       | 7        | 0    | 2.901 | 0.658     | 0.227       | –                               | 0.032 | 0.016 | 0.013     | 0.823       |
|          | 0.03                |       |       |           |             |           | 0.32 |       |           |             | 0.03                |       |       |           |             | 0.07     | 0.23 |       |           |             |                                 |       |       |           |             |
| S        | 7                   | 0.181 | 0.080 | 0.035     | 0.436       | 0.047     | 1    | 0.167 | 0.071     | 0.423       | 0                   | 0.253 | 0.089 | 0.037     | 2.414       | 6        | 7    | 0.158 | 0.051     | 0.325       | 0.075                           | 0.097 | 0.085 | 0.009     | 0.110       |
|          | 0.70                |       |       |           |             |           | 1.39 |       |           |             | 1.32                |       |       |           |             | 0.79     | 2.84 |       |           |             |                                 |       |       |           |             |
| Na       | 3                   | 2.543 | 1.421 | 0.485     | 0.341       | 0.102     | 3    | 0.631 | 0.332     | 0.526       | 5                   | 4.039 | 2.191 | 0.704     | 3.110       | 9        | 6    | 1.464 | 0.635     | 0.434       | 1.442                           | 1.679 | 1.571 | 0.098     | 0.062       |
|          | 1.44                |       |       |           |             |           | 2.95 |       |           |             | 1.39                |       |       |           |             | 1.03     | 3.78 |       |           |             |                                 |       |       |           |             |
| Mg       | 6                   | 3.675 | 2.708 | 0.558     | 0.206       | 0.167     | 6    | 0.819 | 0.558     | 0.681       | 1                   | 3.209 | 2.257 | 0.500     | 4.511       | 0        | 8    | 2.381 | 0.922     | 0.387       | 1.990                           | 2.069 | 2.036 | 0.033     | 0.016       |
|          | 0.01                |       |       |           |             |           | 0.14 |       |           |             |                     |       |       |           |             | 0.01     | 0.15 |       |           |             |                                 |       |       |           |             |
| As       | 4                   | 0.192 | 0.094 | 0.039     | 0.414       | –         | 2    | 0.029 | 0.031     | 1.083       | –                   | 0.175 | 0.067 | 0.042     | 1.610       | 1        | 7    | 0.087 | 0.037     | 0.426       | 0.040                           | 0.096 | 0.063 | 0.024     | 0.384       |
|          | 18.8                |       |       |           |             |           | 46.7 |       |           |             | 18.0                |       |       |           |             | 17.5     | 22.0 |       |           |             |                                 |       |       |           |             |
| Rest     | 6                   | 37.58 | 22.30 | 3.16      | 0.14        | 12.33     | 7    | 21.39 | 6.75      | 0.32        | 6                   | 28.40 | 22.51 | 1.95      | 11.54       | 5        | 9    | 19.84 | 1.54      | 0.08        | 22.78                           | 24.96 | 23.58 | 0.98      | 0.04        |
|          | 62.4                |       |       |           |             |           | 87.6 |       |           |             | 71.6                |       |       |           |             | 77.9     | 82.4 |       |           |             |                                 |       |       |           |             |
| Total    | 3                   | 81.15 | 77.70 | 3.16      | 0.04        | 53.23     | 7    | 78.61 | 6.75      | 0.09        | 0                   | 81.94 | 77.49 | 1.95      | 39.75       | 1        | 5    | 80.16 | 1.54      | 0.02        | 75.04                           | 77.22 | 76.42 | 0.98      | 0.01        |
| Ni+Cu+Co | 0.00                |       |       |           |             |           | 3.85 |       |           |             | 0.00                |       |       |           |             | 1.67     | 4.76 |       |           |             |                                 |       |       |           |             |
| o        | 5                   | 4.912 | 1.161 | 1.422     | 0.122       | 0.112     | 0    | 0.553 | 0.775     | 0.140       | 0                   | 2.002 | 0.125 | 0.278     | 0.045       | 9        | 3    | 3.710 | 0.857     | 0.023       | 0.016                           | 0.032 | 0.024 | 0.007     | 0.028       |

|          |                               |        |       |        |           |                             |      |       |       |           |                |        |       |        |           |              |      |       |       |                                              |             |       |       |        |           |             |
|----------|-------------------------------|--------|-------|--------|-----------|-----------------------------|------|-------|-------|-----------|----------------|--------|-------|--------|-----------|--------------|------|-------|-------|----------------------------------------------|-------------|-------|-------|--------|-----------|-------------|
|          |                               | 2256.8 | 416.0 |        |           |                             |      |       |       |           | 68.9           | 6041.7 | 738.0 |        |           | 39.6         |      |       |       |                                              | 139.7       | 961.5 | 555.3 |        |           |             |
| Mn/Fe    | 2.53                          | 5      | 3     | 484.68 | 1.17      | 0.30                        | 5.71 | 0.88  | 0.84  | 0.95      | 7              | 6      | 9     | 925.88 | 0.80      | 1.56         | 0    | 10.25 | 9.76  | 0.95                                         | 9           | 1     | 4     | 335.53 | 0.60      |             |
| Minerals | Phyllosilicates               |        |       |        |           |                             |      |       |       |           | Mixtures       |        |       |        |           |              |      |       |       |                                              |             |       |       |        |           |             |
|          | Celadonite (=ferroceladonite) |        |       |        |           | Fe-smectite (or nontronite) |      |       |       |           | Fe-Mg chlorite |        |       |        |           | "Iddingsite" |      |       |       | NI mixtures of clays and Mn-Fe oxyhydroxides |             |       |       |        |           |             |
|          | N                             | 3      |       |        |           | 2                           |      |       |       | 3         |                |        |       |        | 3         |              |      |       | 5     |                                              |             |       |       |        |           |             |
|          |                               | Min    | Max   | Mean   | Std. dev. | Coeff. var.                 | Min  | Max   | Mea n | Std. dev. | Coeff. var.    | Min    | Max   | Mean   | Std. dev. | Coeff. var.  | Min  | Max   | Mea n | Std. dev.                                    | Coeff. var. | Min   | Max   | Mean   | Std. dev. | Coeff. var. |
|          | 19.3                          |        |       |        |           |                             | 15.8 |       |       |           | 20.7           |        |       |        |           | 19.5         | 23.0 |       |       |                                              |             |       |       |        |           |             |
| Si       | 3                             | 20.16  | 19.68 | 0.35   | 0.02      | 12.30                       | 9    | 14.10 | 1.79  | 0.13      | 2              | 21.08  | 20.91 | 0.15   | 0.01      | 5            | 4    | 21.70 | 1.53  | 0.07                                         | 4.97        | 14.87 | 9.02  | 3.29   | 0.37      |             |
| Al       | –                             | 0.01   | 0.00  | 0.00   | 1.41      | 1.77                        | 2.16 | 1.97  | 0.20  | 0.10      | 0.73           | 1.01   | 0.86  | 0.12   | 0.13      | 0.34         | 0.58 | 0.43  | 0.11  | 0.25                                         | 0.29        | 2.54  | 1.20  | 0.81   | 0.67      |             |
| Cl       | –                             | –      | –     | –      | –         | 0.141                       | 3    | 0.312 | 0.171 | 0.548     | 2              | 0.075  | 0.060 | 0.011  | 0.177     | 3            | 0    | 0.084 | 0.016 | 0.046                                        | 0.104       | 0.631 | 0.390 | 0.211  | 0.541     |             |
| Ba       | 0.14                          |        |       |        |           |                             | 0.02 |       |       |           |                |        |       |        |           |              | 0.10 |       |       |                                              |             |       |       |        |           |             |
|          | 7                             | 0.174  | 0.159 | 0.011  | 0.070     | 0.007                       | 8    | 0.017 | 0.010 | 0.590     | –              | 0.073  | 0.024 | 0.035  | 1.414     | –            | 0    | 0.044 | 0.042 | 0.955                                        | –           | 0.178 | 0.059 | 0.067  | 1.128     |             |
| Ca       | 0.51                          |        |       |        |           |                             | 0.26 |       |       |           | 0.14           |        |       |        |           | 0.12         | 0.53 |       |       |                                              |             |       |       |        |           |             |
|          | 3                             | 0.562  | 0.532 | 0.021  | 0.040     | 0.263                       | 9    | 0.266 | 0.003 | 0.011     | 6              | 0.280  | 0.230 | 0.060  | 0.260     | 9            | 6    | 0.265 | 0.191 | 0.723                                        | 0.273       | 1.869 | 1.153 | 0.583  | 0.506     |             |
| Fe       | 17.8                          |        |       |        |           |                             | 32.0 |       |       |           | 27.3           |        |       |        |           | 23.7         | 24.9 |       |       |                                              |             |       |       |        |           |             |
|          | 6                             | 18.10  | 17.97 | 0.10   | 0.01      | 23.74                       | 3    | 27.88 | 4.15  | 0.15      | 5              | 28.45  | 27.94 | 0.45   | 0.02      | 1            | 8    | 24.43 | 0.53  | 0.02                                         | 30.98       | 41.31 | 34.80 | 4.09   | 0.12      |             |
| Mn       | 11.0                          |        |       |        |           |                             |      |       |       |           |                |        |       |        |           |              |      |       |       |                                              |             |       |       |        |           |             |
|          | 0                             | 12.27  | 11.45 | 0.58   | 0.05      | 0.22                        | 0.28 | 0.25  | 0.03  | 0.11      | 0.17           | 0.24   | 0.20  | 0.03   | 0.14      | 0.03         | 3.25 | 1.13  | 1.50  | 1.32                                         | 1.27        | 13.91 | 7.21  | 5.26   | 0.73      |             |
| Ti       | 0.00                          |        |       |        |           |                             | 0.16 |       |       |           |                |        |       |        |           | 0.02         | 0.21 |       |       |                                              |             |       |       |        |           |             |
|          | 9                             | 0.062  | 0.038 | 0.022  | 0.577     | 0.150                       | 4    | 0.157 | 0.007 | 0.046     | –              | 0.013  | 0.007 | 0.005  | 0.794     | 1            | 6    | 0.086 | 0.092 | 1.065                                        | 0.107       | 0.192 | 0.157 | 0.034  | 0.218     |             |
| P        | –                             | –      | –     | –      | –         | 0.026                       | 7    | 0.026 | 0.001 | 0.025     | 0.02           | 7      | 0.027 | 0.027  | 0.027     | 0.027        | 4    | 4     | 0.004 | 0.004                                        | 0.004       | 0.030 | 0.801 | 0.431  | 0.248     | 0.575       |
| Pb       | –                             | –      | –     | –      | –         | –                           | –    | –     | –     | –         | 1              | 0.030  | 0.021 | 0.021  | 0.021     | –            | –    | –     | –     | –                                            | –           | 0.042 | 0.024 | 0.014  | 0.584     |             |
| Cu       | –                             | –      | –     | –      | –         | 0.043                       | 0.09 |       |       |           | –              | –      | –     | –      | –         | –            | –    | –     | –     | –                                            | 0.054       | 0.112 | 0.085 | 0.019  | 0.221     |             |
|          |                               |        |       |        |           |                             | 0    | 0.067 | 0.024 | 0.353     | 0.04           |        |       |        |           | 0.01         | 0.01 |       |       |                                              |             |       |       |        |           |             |
| Co       | –                             | –      | –     | –      | –         | 0.038                       | 2    | 0.040 | 0.002 | 0.059     | 0              | 0.040  | 0.040 | 0.040  | 0.040     | 0            | 0    | 0.010 | 0.010 | 0.010                                        | 0.015       | 0.095 | 0.053 | 0.029  | 0.537     |             |
| K        | 2.57                          |        |       |        |           |                             | 1.03 |       |       |           | 3.47           |        |       |        |           | 2.32         | 3.66 |       |       |                                              |             |       |       |        |           |             |
|          | 2                             | 2.649  | 2.609 | 0.031  | 0.012     | 0.676                       | 3    | 0.855 | 0.178 | 0.209     | 9              | 3.589  | 3.535 | 0.045  | 0.013     | 6            | 9    | 3.172 | 0.601 | 0.189                                        | 0.147       | 1.261 | 0.555 | 0.398  | 0.718     |             |
| Sr       | –                             | –      | –     | –      | –         | –                           | 0.01 |       |       |           | –              | 0.009  | 0.008 | 0.008  | 0.009     | –            | 9    | 0.029 | 0.029 | 0.029                                        | –           | –     | –     | –      | –         |             |
|          |                               |        |       |        |           |                             | 0.02 |       |       |           | 0.00           |        |       |        |           | 0.00         | 0.03 |       |       |                                              |             |       |       |        |           |             |
| Zn       | –                             | –      | –     | –      | –         | –                           | 7    | 0.014 | 0.014 | 1.000     | –              | 0.031  | 0.031 | 0.031  | 0.031     | 7            | 8    | 0.035 | 0.007 | 0.038                                        | 0.006       | 0.112 | 0.071 | 0.039  | 0.547     |             |
|          |                               |        |       |        |           |                             | 0.00 |       |       |           |                |        |       |        |           |              | 0.02 |       |       |                                              |             |       |       |        |           |             |
| Tl       | –                             | –      | –     | –      | –         | –                           | 4    | 0.002 | 0.002 | 1.000     | –              | 0.052  | 0.052 | 0.052  | 0.052     | –            | 4    | 0.005 | 0.000 | 0.024                                        | –           | 0.042 | 0.011 | 0.016  | 1.432     |             |
| Ni       | –                             | –      | –     | –      | –         | –                           | 0.01 |       |       |           | –              | 0.027  | 0.027 | 0.021  | 0.027     | –            | 0.04 | 0.017 | 0.017 | 0.040                                        | 0.019       | 0.126 | 0.050 | 0.040  | 0.815     |             |
|          |                               |        |       |        |           |                             | 0.04 |       |       |           | 0.01           |        |       |        |           | 0.01         | 0.03 |       |       |                                              |             |       |       |        |           |             |
| S        | –                             | –      | –     | –      | –         | 0.027                       | 2    | 0.035 | 0.007 | 0.207     | 9              | 0.029  | 0.029 | 0.029  | 0.029     | 9            | 3    | 0.023 | 0.019 | 0.033                                        | 0.015       | 0.156 | 0.082 | 0.051  | 0.623     |             |
|          | 0.99                          |        |       |        |           |                             | 1.05 |       |       |           | 0.54           |        |       |        |           | 0.79         | 0.83 |       |       |                                              |             |       |       |        |           |             |
| Na       | 4                             | 1.361  | 1.176 | 0.150  | 0.128     | 0.443                       | 7    | 0.750 | 0.307 | 0.409     | 4              | 0.674  | 0.591 | 0.059  | 0.100     | 0            | 8    | 0.815 | 0.019 | 0.024                                        | 0.189       | 1.094 | 0.711 | 0.337  | 0.474     |             |
|          | 2.14                          |        |       |        |           |                             | 0.18 |       |       |           | 1.69           |        |       |        |           | 2.14         | 2.47 |       |       |                                              |             |       |       |        |           |             |
| Mg       | 0                             | 2.178  | 2.158 | 0.016  | 0.007     | 0.139                       | 5    | 0.162 | 0.023 | 0.141     | 1              | 1.802  | 1.740 | 0.046  | 0.026     | 5            | 9    | 2.295 | 0.138 | 0.060                                        | 0.216       | 0.921 | 0.560 | 0.232  | 0.415     |             |
|          |                               |        |       |        |           |                             | 0.04 |       |       |           | 0.04           |        |       |        |           |              | 0.11 |       |       |                                              |             |       |       |        |           |             |
| As       | –                             | –      | –     | –      | –         | –                           | –    | –     | –     | –         | 3              | 0.070  | 0.070 | 0.044  | 0.070     | –            | 6    | 0.113 | 0.113 | 0.116                                        | –           | 0.058 | 0.021 | 0.026  | 1.238     |             |
| Y        | –                             | 0.039  | 0.022 | 0.016  | 0.731     | 16.20                       | 9    |       |       |           | –              | –      | –     | –      | –         | –            | –    | –     | –     | –                                            | –           | –     | –     | –      | –         |             |
|          | 0.00                          |        |       |        |           | 63.44                       |      |       |       |           | –              |        |       |        |           | –            |      |       |       |                                              | –           | –     | –     | –      | –         |             |
| Cr       | 8                             | 0.018  | 0.015 | 0.005  | 0.343     | 3                           | –    | –     | –     | –         | –              | –      | –     | –      | –         | –            | –    | –     | –     | –                                            | –           | –     | –     | –      | –         |             |
|          | 10.2                          |        |       |        |           |                             | 36.5 |       |       |           |                |        |       |        |           |              | 11.0 |       |       |                                              |             |       |       |        |           |             |
| Rest     | 0                             | 11.18  | 10.58 | 0.43   | 0.04      | 0.99                        | 6    | 26.38 | 10.17 | 0.39      | 8.33           | 8.84   | 8.70  | 8.70   | 8.84      | 9.34         | 5    | 10.00 | 0.75  | 0.07                                         | 15.29       | 24.45 | 18.00 | 3.29   | 0.18      |             |

|                 |           |       |       |      |      |      |           |       |       |       |           |       |       |       |       |           |           |       |       |       |       |       |       |       |       |
|-----------------|-----------|-------|-------|------|------|------|-----------|-------|-------|-------|-----------|-------|-------|-------|-------|-----------|-----------|-------|-------|-------|-------|-------|-------|-------|-------|
| <b>Total</b>    | 88.8<br>2 | 89.80 | 89.42 | 0.43 | 0.00 | 0.01 | 83.7<br>9 | 73.62 | 10.17 | 0.14  | 91.1<br>6 | 91.67 | 91.67 | 91.30 | 91.67 | 88.9<br>6 | 90.6<br>6 | 90.00 | 0.75  | 0.01  | 75.55 | 84.71 | 82.00 | 3.29  | 0.04  |
| <b>Ni+Cu+Co</b> | —         | —     | —     | —    | —    | —    | 0.12<br>8 | 0.113 | 0.015 | 0.013 | 0.06<br>7 | 0.122 | 0.122 | 0.122 | 0.122 | 0.02<br>3 | 0.18<br>4 | 0.033 | 0.033 | 0.184 | 0.119 | 0.313 | 0.188 | 0.069 | 0.037 |
| <b>Mn/Fe</b>    | —         | —     | —     | —    | —    | —    | 0.00<br>9 | 0.009 | —     | 0.040 | 0.00<br>6 | 0.009 | 0.009 | 0.009 | 0.009 | 0.13<br>0 | 0.13<br>0 | —     | 0.130 | 0.130 | 0.031 | 0.449 | 0.221 | 0.172 | 0.780 |

**Table S3.** Archival data of chemical composition of bulk Fe-Mn crust samples collected in the area of C-NSC.

[illegible]

|    |                                |                      |                        |           |        |       |        |       |      |      |       |       |      |      |      |      |      |      |      |      |      |       |
|----|--------------------------------|----------------------|------------------------|-----------|--------|-------|--------|-------|------|------|-------|-------|------|------|------|------|------|------|------|------|------|-------|
| 5  | ISA                            | 2.698 N              | 95.242 W               | 2596      | 0.07   | 47.47 | 0.03   | 0.26  | -    | -    | -     | -     | -    | -    | -    | -    | -    | -    | -    | -    | -    | -     |
| 6  | ISA                            | 2.6852 N             | 95.235 W               | -         | 0.02   | 54.61 | 0.01   | -     | -    | -    | -     | -     | -    | -    | -    | -    | -    | -    | -    | -    | -    | -     |
| 7  | ISA                            | 2.9525 N             | 95.167 W               | -         | 0.87   | 33.48 | 0.08   | -     | 700  | -    | -     | -     | -    | -    | -    | -    | -    | -    | -    | -    | -    | -     |
| 8  | ISA                            | 2.422 N              | 95.407 W               | 2267      | 0.28   | 16.35 | 0.05   | 18.47 | 100  | -    | -     | -     | -    | -    | -    | -    | -    | -    | -    | -    | -    | -     |
| 9  | ISA                            | 1.385 N              | 93.733 W               | 2643      | 0.74   | 18.65 | 0.13   | 14.23 | 700  | -    | -     | -     | -    | -    | -    | -    | -    | -    | -    | -    | -    | -     |
| 10 | ISA                            | 1.817 N              | 93.635 W               | 2755      | 0.34   | 17.89 | 0.07   | 18.95 | 900  | -    | -     | -     | -    | -    | -    | -    | -    | -    | -    | -    | -    | -     |
| 11 | LEG 70                         | 1°N                  | 86°W                   | 2699-2702 | 0.0124 | 44.0  | 0.008  | 0.66  | 13   | 93   | -     | -     | -    | -    | -    | -    | -    | -    | -    | -    | -    | -     |
| 12 | LEG 70 Site 507A “Upper crust” | 0°34.0'N             | 86°05.4'W              | 2699-2704 | 0.0759 | 32.33 | 0.0199 | 5.24  | 28   | 482  | 13.40 | 14.60 | -    | 2.45 | 0.49 | -    | 0.52 | -    | 2.06 | 0.38 | 5.80 | 39.70 |
| 13 | LEG 70 Site 507A “Lower crust” | 0°34.0'N             | 86°05.4'W              | 2699-2704 | 0.0051 | 30.82 | 0.0044 | 2.87  | 10.5 | 50   | 5.40  | 4.60  | -    | 0.74 | 0.27 | -    | 0.21 | -    | 0.56 | 0.10 | 1.70 | 13.58 |
| 14 | TB1                            | 0°25'N-0°38'N        | 86°04'W-86°09'W        | -         | 0.0496 | 51.1  | 0.0099 | 0.31  | 8.7  | 301  | 3.20  | 3.40  | 0.40 | 0.39 | 0.16 | -    | 0.08 | -    | 0.51 | 0.13 | 0.76 | 9.03  |
| 15 | TB2                            | 0°25'N-0°38'N        | 86°04'W-86°09'W        | -         | 0.085  | 50.1  | 0.0186 | 0.33  | 8.1  | 753  | 3.90  | 4.40  | -    | 0.43 | 0.14 | -    | 0.08 | -    | 0.70 | 0.17 | 0.97 | 10.79 |
| 16 | TB3                            | 0°25'N-0°38'N        | 86°04'W-86°09'W        | -         | 0.0122 | 50.2  | 0.0048 | 0.19  | 2.9  | 245  | 2.50  | 1.80  | -    | 0.40 | 0.12 | -    | 0.07 | -    | 0.56 | 0.10 | 0.95 | 6.50  |
| 17 | TB4                            | 0°25'N-0°38'N        | 86°04'W-86°09'W        | -         | 0.0076 | 50.8  | 0.003  | 0.03  | 1.3  | 38   | 0.80  | 1.00  | -    | 0.07 | 0.12 | -    | 0.01 | -    | 0.22 | 0.05 | 0.18 | 2.45  |
| 18 | TB5                            | 0°25'N-0°38'N        | 86°04'W-86°09'W        | -         | 0.0158 | 50.3  | 0.0065 | 0.26  | 3.5  | 163  | 3.10  | 2.50  | -    | 0.56 | 0.10 | -    | 0.07 | -    | 0.53 | 0.13 | 0.86 | 7.85  |
| 19 | TB6                            | 0°25'N-0°38'N        | 86°04'W-86°09'W        | -         | 0.148  | 46.7  | 0.0264 | 0.57  | 5.9  | 1070 | 3.70  | 1.50  | -    | 0.75 | 0.16 | -    | 0.09 | -    | 0.66 | 0.17 | 0.54 | 7.57  |
| 20 | TB7                            | 0°25'N-0°38'N        | 86°04'W-86°09'W        | -         | 0.0103 | 51.0  | 0.0029 | 0.14  | 2.4  | 75   | 1.80  | 1.30  | -    | 0.26 | 0.09 | -    | 0.06 | -    | 0.43 | 0.09 | 0.62 | 4.65  |
| 21 | 124GTVK K2                     | 0°46.05' - 0°46.15'N | 85°53.39' - 85°53.55'W | -         | 0.0042 | 18.59 | 0.0025 | 17.98 | <20  | 49   | 1.61  | 1.82  | 0.94 | <0.5 | 0.66 | 0.68 | -    | 0.78 | 0.53 | 0.13 | -    | 7.15  |
| 22 | 40GTVK K3                      | 0°46.05' - 0°46.15'N | 85°53.39' - 85°53.55'W | -         | 0.0052 | 14.88 | 0.0361 | 31.54 | <20  | 1211 | 1.81  | 2.04  | 1.27 | <0.5 | 0.30 | 1.02 | -    | 1.10 | 1.16 | 0.29 | -    | 8.99  |
| 23 | 119GTVK K8                     | 0°46.05' - 0°46.15'N | 85°53.39' - 85°53.55'W | -<br>-    | 0.0029 | 11.45 | 0.2509 | 39.04 | 23   | 2240 | 1.73  | 1.14  | <0.9 | <0.5 | 0.07 | <0.3 | -    | <0.3 | 0.22 | 0.07 | -    | 3.23  |
| 24 | 135GTVK K10                    | 0°46.05' - 0°46.15'N | 85°53.39' - 85°53.55'W |           | 0.0186 | 63.69 | 0.0039 | 0.15  | <20  | 203  | 1.24  | <0.9  | <0.9 | <0.5 | 0.05 | <0.3 | -    | 0.76 | <0.2 | 0.15 | -    | 2.20  |

|    |                 |                         |                           |   |        |       |         |        |      |      |      |      |      |      |       |      |   |      |      |       |   |      |
|----|-----------------|-------------------------|---------------------------|---|--------|-------|---------|--------|------|------|------|------|------|------|-------|------|---|------|------|-------|---|------|
| 25 | 134GTVC K14     | 0°46.05' -<br>0°46.15'N | 85°53.39' -<br>85°53.55'W | - | 0.0106 | 63.74 | 0.023   | 0.82   | 59   | 87   | 1.28 | <0.9 | <0.9 | <0.5 | <0.05 | <0.3 | - | <0.3 | <0.2 | <0.06 | - | 1.29 |
| 26 | D6 0-1          | -                       | -                         | - | -      | 49.1  | <0.0055 | 0.079  | 86   | 276  | -    | -    | -    | -    | -     | -    | - | -    | -    | -     | - | -    |
| 27 | D6 0-3          | -                       | -                         | - | 0.01   | 52.7  | 0.0043  | 0.016  | <23  | 105  | -    | -    | -    | -    | -     | -    | - | -    | -    | -     | - | -    |
| 28 | D6 3-6          | -                       | -                         | - | 0.0058 | 65.2  | 0.0009  | 0.013  | 15   | 85   | -    | -    | -    | -    | -     | -    | - | -    | -    | -     | - | -    |
| 29 | D6 6-9          | -                       | -                         | - | 0.0068 | 49.6  | 0.0014  | 0.020  | 17   | 143  | -    | -    | -    | -    | -     | -    | - | -    | -    | -     | - | -    |
| 30 | D6 9-13         | -                       | -                         | - | -      | 60.7  | 0.0018  | 0.097  | 42   | 4600 | -    | -    | -    | -    | -     | -    | - | -    | -    | -     | - | -    |
| 31 | D6 13-17        | -                       | -                         | - | -      | 58.2  | 0.0016  | 0.099  | 35   | 4090 | -    | -    | -    | -    | -     | -    | - | -    | -    | -     | - | -    |
| 32 | D6 18-20        | -                       | -                         | - | 0.05   | 46.8  | 0.0203  | 1.076  | <23  | 4860 | -    | -    | -    | -    | -     | -    | - | -    | -    | -     | - | -    |
| 33 | D9 0-1          | -                       | -                         | - | 0.49   | 27.2  | 0.0496  | 48.416 | 1574 | 1000 | -    | -    | -    | -    | -     | -    | - | -    | -    | -     | - | -    |
| 34 | D9 0-3          | -                       | -                         | - | 0.63   | 25.5  | 0.0936  | 16.575 | 909  | 1765 | -    | -    | -    | -    | -     | -    | - | -    | -    | -     | - | -    |
| 35 | D9 5-11         | -                       | -                         | - | 0.0535 | 36.4  | 0.0065  | 0.040  | <50  | 2540 | -    | -    | -    | -    | -     | -    | - | -    | -    | -     | - | -    |
|    |                 | -                       | -                         | - |        |       |         |        |      |      |      |      |      |      |       |      |   |      |      |       |   |      |
| 36 | D9 20-22        | -                       | -                         | - | 2.3    | 44.8  | 0.1742  | 0.081  | 166  | 20   | -    | -    | -    | -    | -     | -    | - | -    | -    | -     | - | -    |
|    |                 |                         |                           | - |        |       |         |        |      |      |      |      |      |      |       |      |   |      |      |       |   |      |
| 37 | 507D            | -                       | -                         |   | -      | 51.36 | 0.36    | 0.28   | -    | -    | -    | -    | -    | -    | -     | -    | - | -    | -    | -     | - | -    |
| 38 | 509B-1-2, 85-90 | -                       | -                         | - | -      | 47.23 | 0.15    | 0.117  | -    | -    | 3.16 | 3.81 | 0.61 | 0.24 | -     | -    | - | -    | -    | 0.10  | - | 7.92 |

*Data source:*  
 1-10. [106]  
 11. Average of 8 samples: [31]  
 12-13. [31]  
 14-20. [88]  
 21-25. data from GARIMAS project [40]  
 26-36. [38]  
 37-38. [32]
